# Supplementary material
Source: PubMed Central journal article supplement (PMC8087200)
Supplement: jci-131-142088-s116.pdf [file jci-131-142088-s116.pdf]

Supplementary Table 1. Demographic and clinical characteristics of study participants

| Subject | Age  | Gender | Location of HSV lesion | HSV1/2  | Site of control biopsy |
|---------|------|--------|------------------------|---------|------------------------|
| 1       | 46.8 | F      | Perineal               | HSV-1&2 | Contra                 |
| 2       | 63   | F      | Buttock                | HSV-1&2 | Contra                 |
| 3       | 60.9 | F      | Buttock                | HSV-2   | Arm                    |
| 4       | 46   | F      | Labia                  | HSV-2   | Arm                    |
| 5       | 26.2 | M      | Mons                   | HSV-1&2 | Arm                    |
| 6       | 32.3 | F      | Labia                  | HSV-2   | Contra                 |
| 7       | 56.7 | F      | Buttock                | HSV-1&2 | Contra                 |
| 8       | 51.2 | F      | Buttock                | HSV-2   | Contra                 |
| 9       | 48.5 | F      | Buttock                | HSV-2   | Arm                    |
| 10      | 47   | F      | Buttock                | HSV-1&2 | Contra                 |
| 11      | 58.5 | F      | Buttock                | HSV-2   | Arm                    |
| 12      | 57.7 | F      | Perianal               | HSV-2   | Arm                    |
| 13      | 52.9 | M      | Buttock                | HSV-2   | Contra                 |
| 14      | 18.5 | F      | Mons                   | HSV-2   | Contra                 |
| 15      | 66.3 | F      | Buttock                | HSV-1&2 | Arm                    |
| 16      | 33.1 | F      | Buttock                | HSV-2   | Contra                 |

Supplementary Figure 1. Comparison of the relative expression of CXCL12 (A) and CXCR4 (B) in genital skin biopsies using array-based gene expression data from Gene Expression Omnibus. Dataset GSE18527.

### A. CXCL12

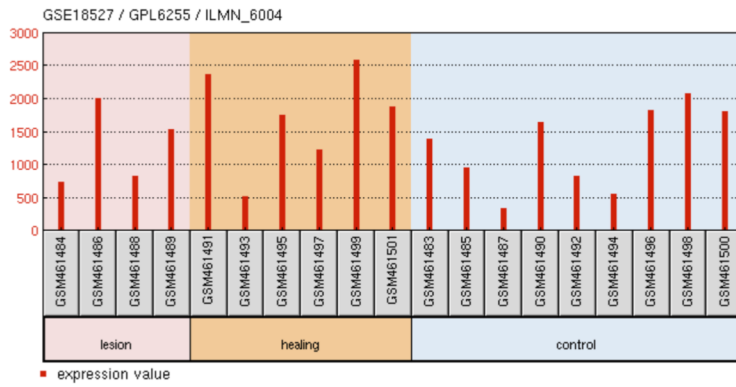

### B. CXCR4

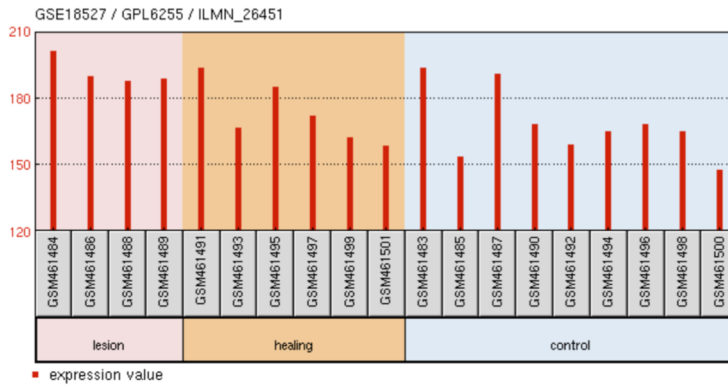

Supplementary Figure 2. RMCorr graphs showing correlation over multiple participants of transformed data. Lack of correlation between IgG+ and T cell subsets. Participants are labeled by color, Biopsies from genital and control areas from each participant are included in each graph. Results from pooled Spearman signed-rank analysis is shown for comparison.

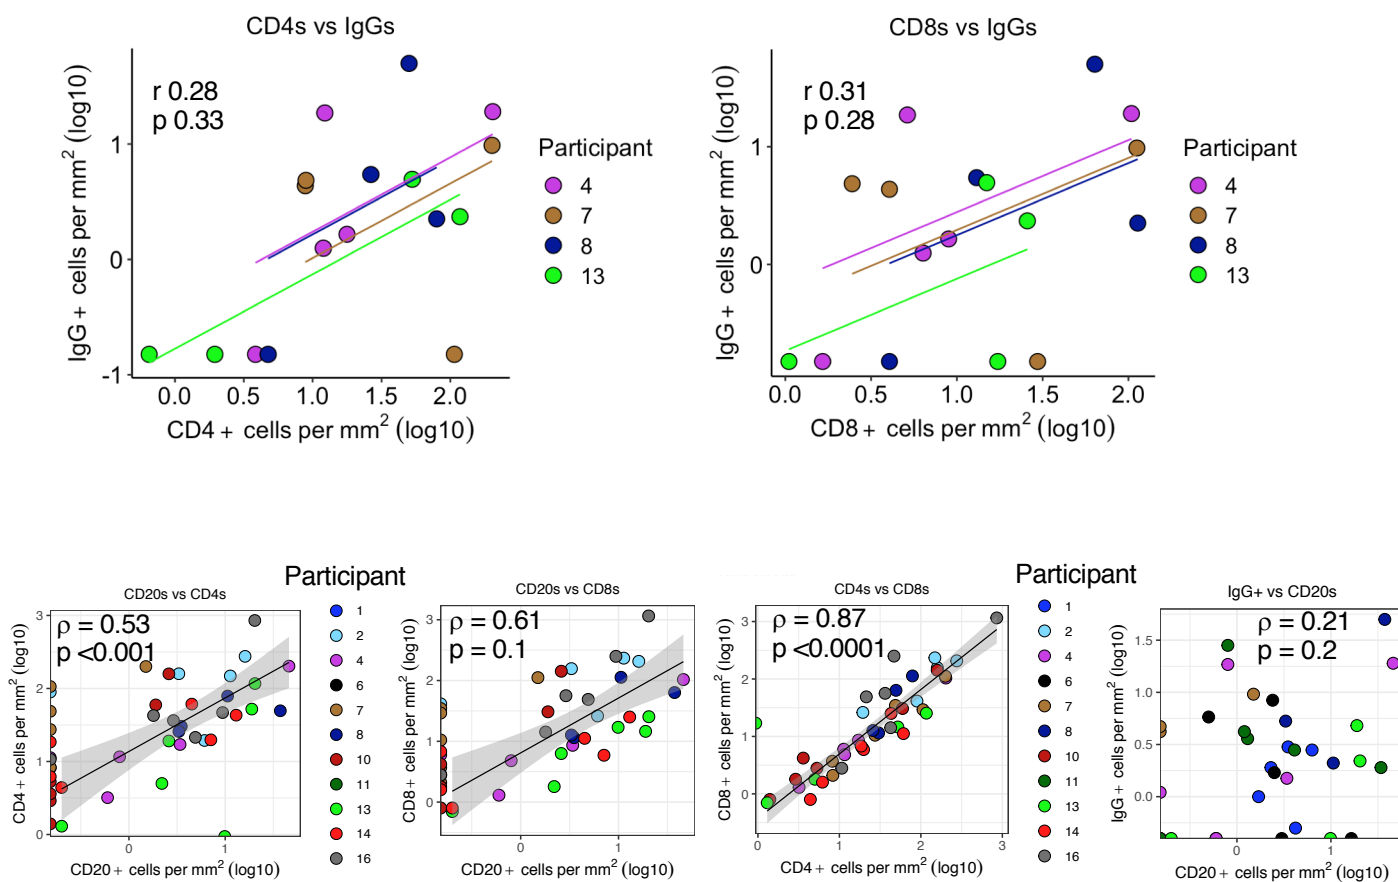

Supplementary Figure 3. Isotype control (A) and isolated primary antibody (B, no secondary antibody) for IgG IFA and additional images of *IGHG* co-expression by FISH with *PRDM1* (C), *CXCR4* (D), and *IRF4* (E).

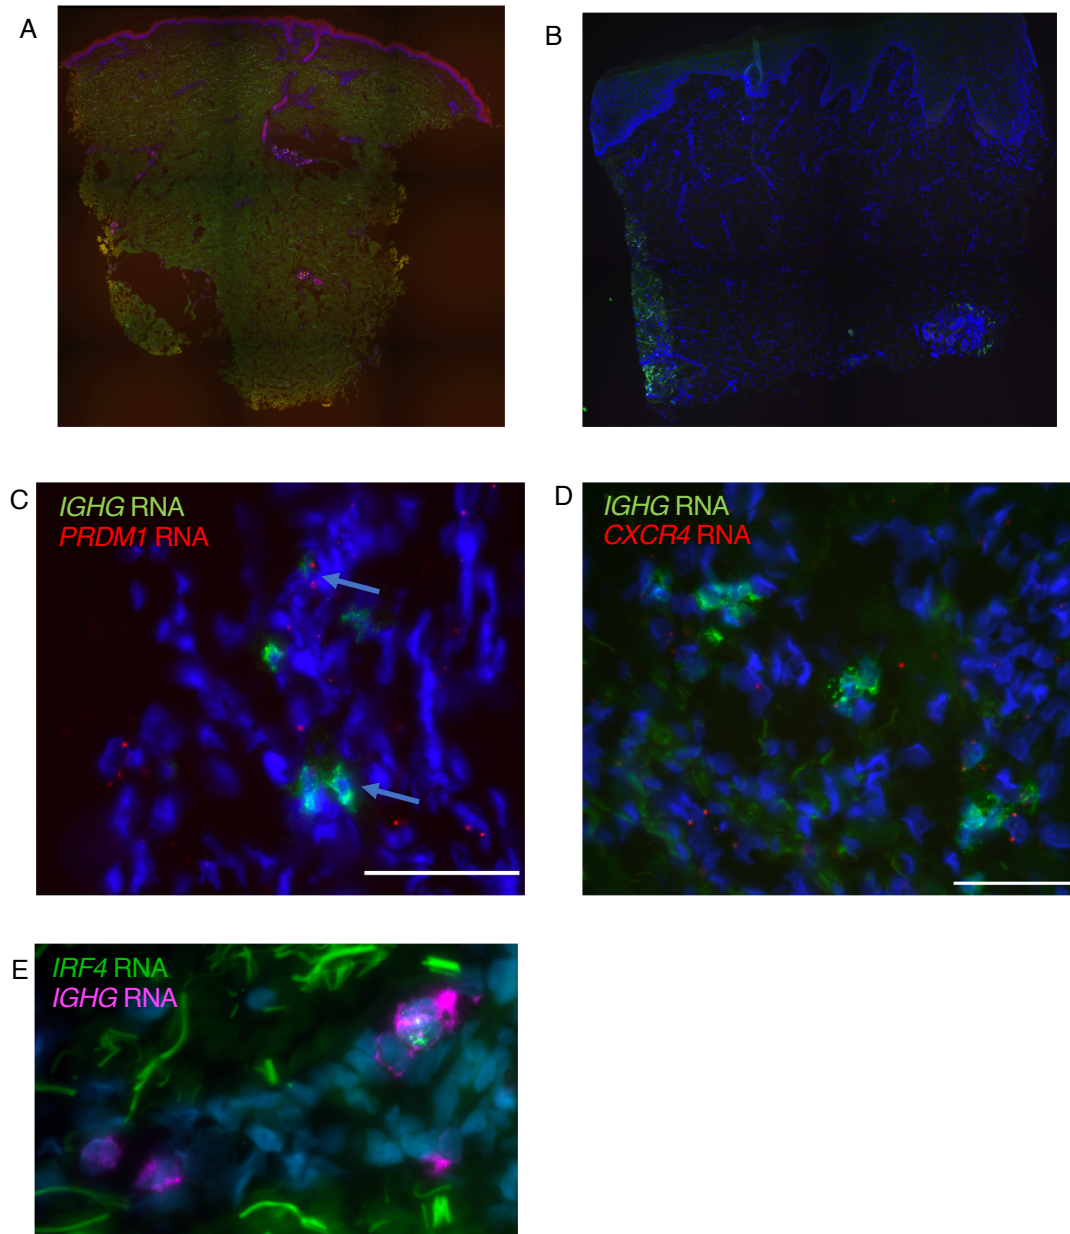

Supplementary Figure 4. Reactivity of patient sera collected during HSV-2 reactivation in genital skin to HSV-2 and control antigens. All measurements were performed in duplicates in one experiment using GCLP-qualified Luminex HSV-2 binding antibody assay. Values from these dilution curves were used to calculate the area under the curve (AUC) summarized in Supplementary Table 2.

Participant 1

Participant 6

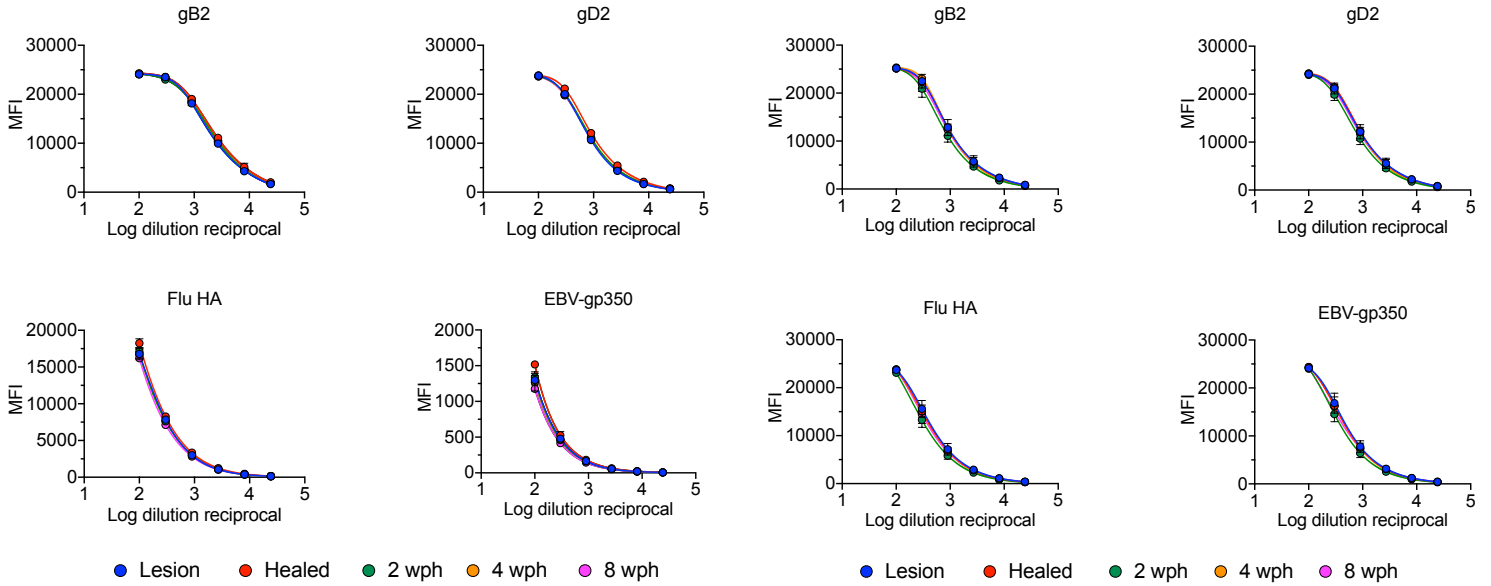

Supplementary Table 2. Area under the binding curve for titration of serum samples collected concurrently with genital skin biopsies (Supplementary Figure 4).

|               | Lesion/<br>Control | Healing | 2 wph | 4 wph | 8 wph |
|---------------|--------------------|---------|-------|-------|-------|
| Participant 1 |                    |         |       |       |       |
| gB2           | 32797              | 34319   | 33089 | 33492 | 33103 |
| gD2           | 23328              | 25318   | 23833 | 23665 | 23532 |
| Flu-HA        | 9890               | 10731   | 9931  | 9890  | 9321  |
| EBV gp350     | 654.1              | 744.1   | 656.9 | 637.4 | 582.4 |
| Participant 6 |                    |         |       |       |       |
| gB2           | 26953              | 26821   | 24505 | 26847 | 26046 |
| gD2           | 25590              | 25790   | 23541 | 25383 | 24838 |
| Flu-HA        | 18527              | 18100   | 16195 | 17926 | 17512 |
| EBV gp350     | 19714              | 19340   | 17472 | 19159 | 19110 |

All measurements were performed in duplicate in one experiment using GCLP-qualified Luminex HSV2 binding antibody assay.

Supplementary Figure 5. Reactivity of patient sera collected at the time point closest to the biopsy analyzed to HSV2 and control antigens. All measurements were performed in duplicates in one experiment using GCLP-qualified Luminex HSV2 binding antibody assay. Values from the dilution curves were used to determine the area under the curve (AUC) summarized in Supplementary Table 2.

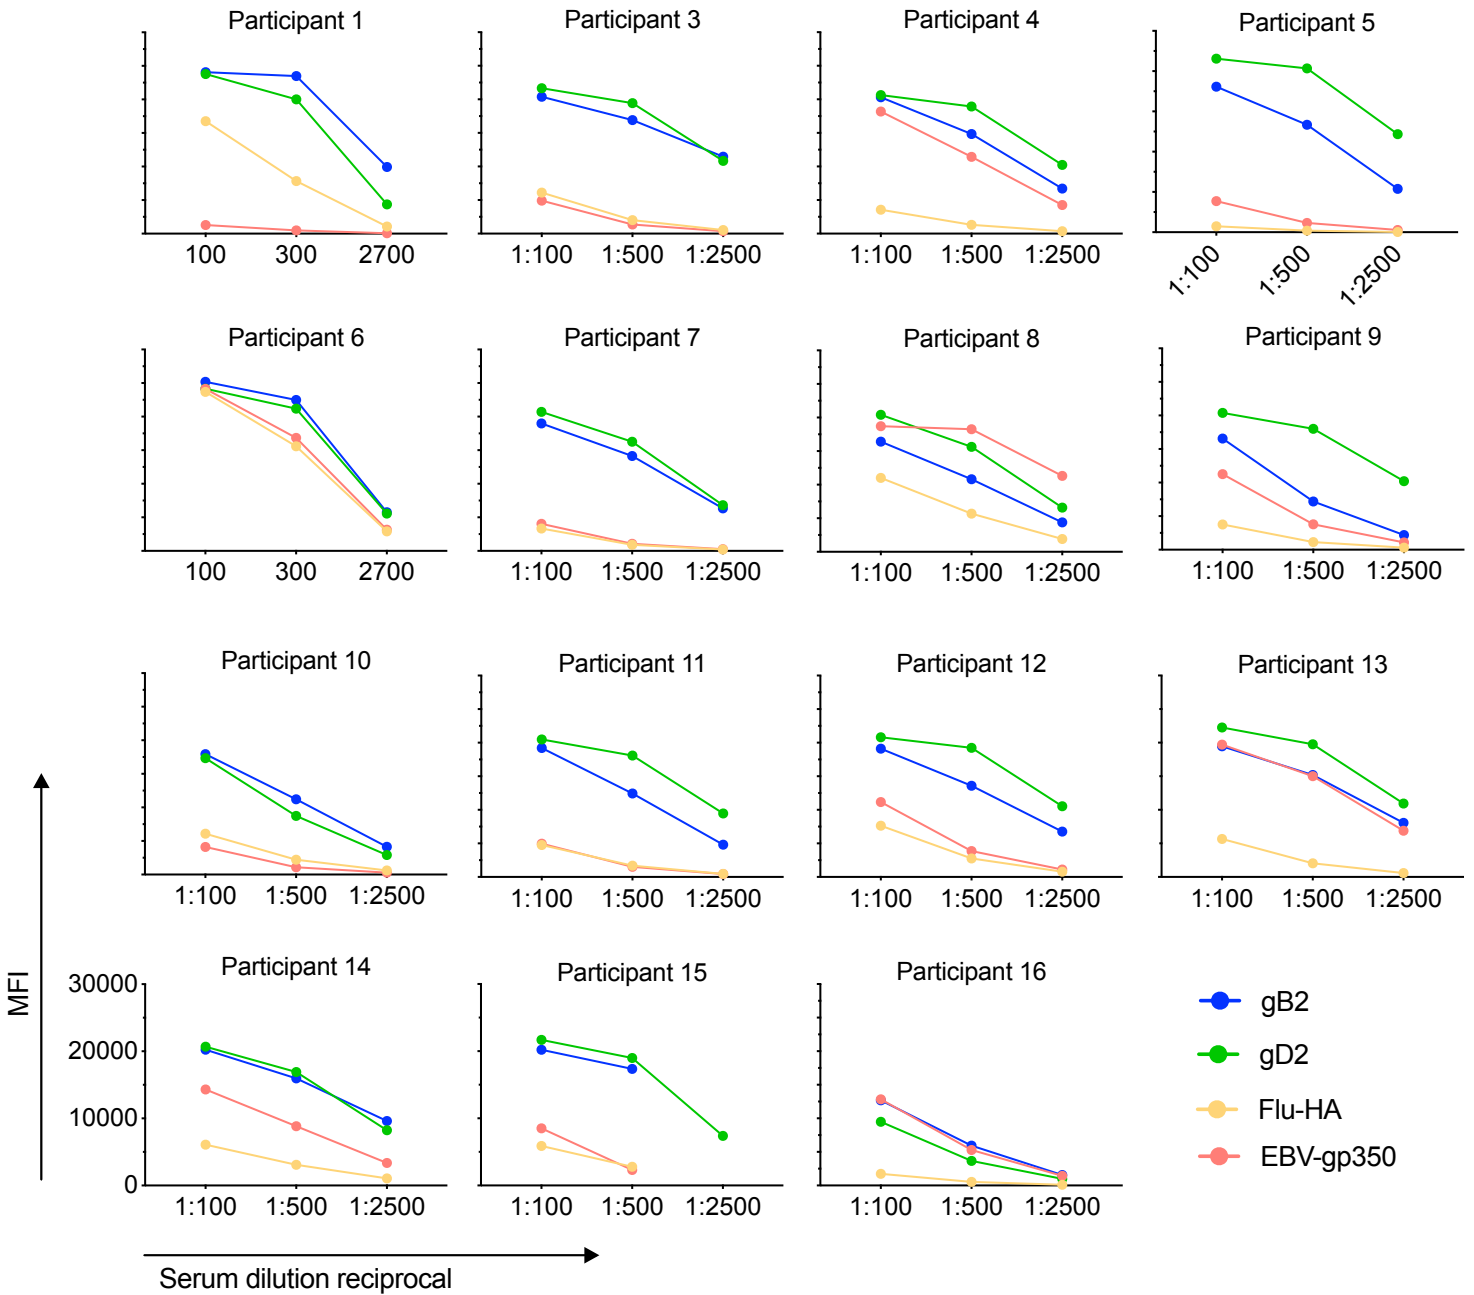

Supplementary Table 3. Area under the binding curve for serum antibody titration presented on the Supplementary Figure 5. All measurements were performed in duplicates in one experiment using GCLP-qualified Luminex HSV-2 binding antibody assay.

| Participant | AUC   |       |           |        |
|-------------|-------|-------|-----------|--------|
|             | gB2   | gD2   | EBV gp350 | Flu-HA |
| 1           | 40503 | 34094 | 1155      | 16752  |
| 2           | ND    | ND    | ND        | ND     |
| 3           | 32816 | 35684 | 4006      | 6269   |
| 4           | 28339 | 34379 | 22671     | 3270   |
| 5           | 25076 | 37211 | 3230      | 575.8  |
| 6           | 37948 | 36046 | 30478     | 28894  |
| 7           | 26804 | 30027 | 3213      | 2690   |
| 8           | 21202 | 29135 | 33278     | 12150  |
| 9           | 16567 | 33321 | 9956      | 3171   |
| 10          | 22263 | 18853 | 3285      | 5567   |
| 11          | 24454 | 33078 | 4209      | 4296   |
| 12          | 26532 | 34902 | 9999      | 6974   |
| 13          | 28964 | 36371 | 28316     | 5154   |
| 14          | 30898 | 31376 | 17674     | 6670   |
| 15          | 18793 | 33526 | 5413      | 4332   |
| 16          | 13068 | 8913  | 12417     | 1467   |
